# Supplementary figures and images for: Immunogenicity Persistence of Different Immunization Regimens of Rabies Vaccine in the 10–60 Years Age Group: A Follow-Up Report Based on Phase III Clinical Trial
Source: MDPI journal article supplement (doi:10.3390/vaccines12111209), 2024-10-24

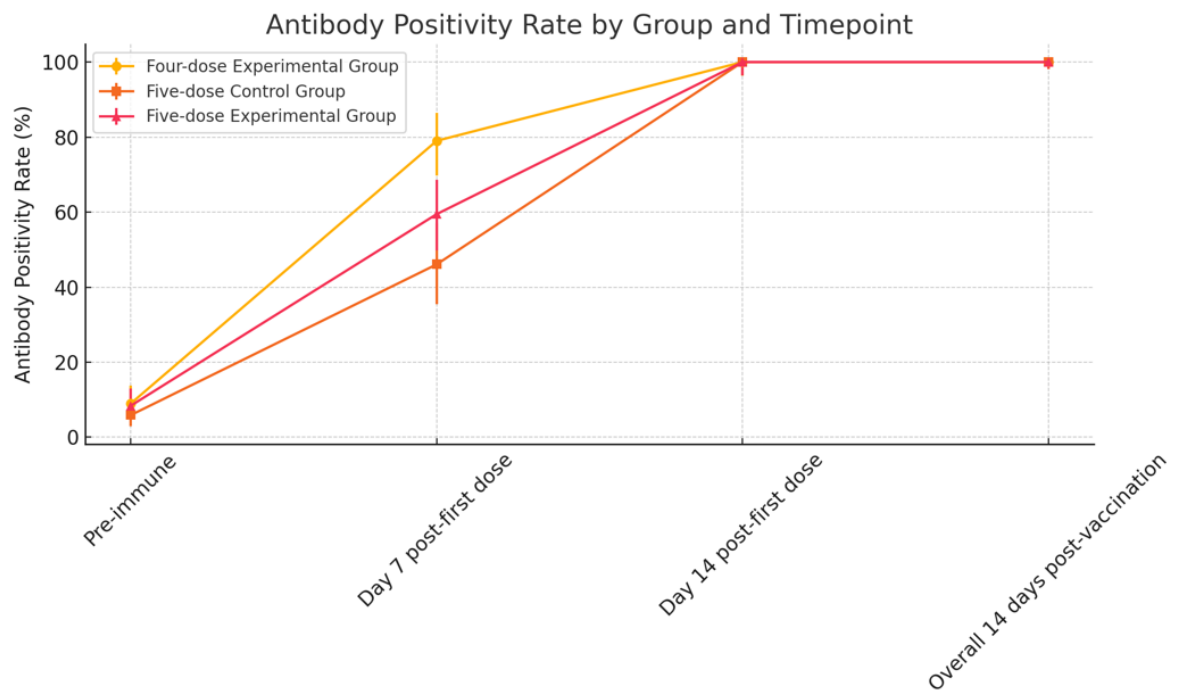

Supplementary Figure S1A

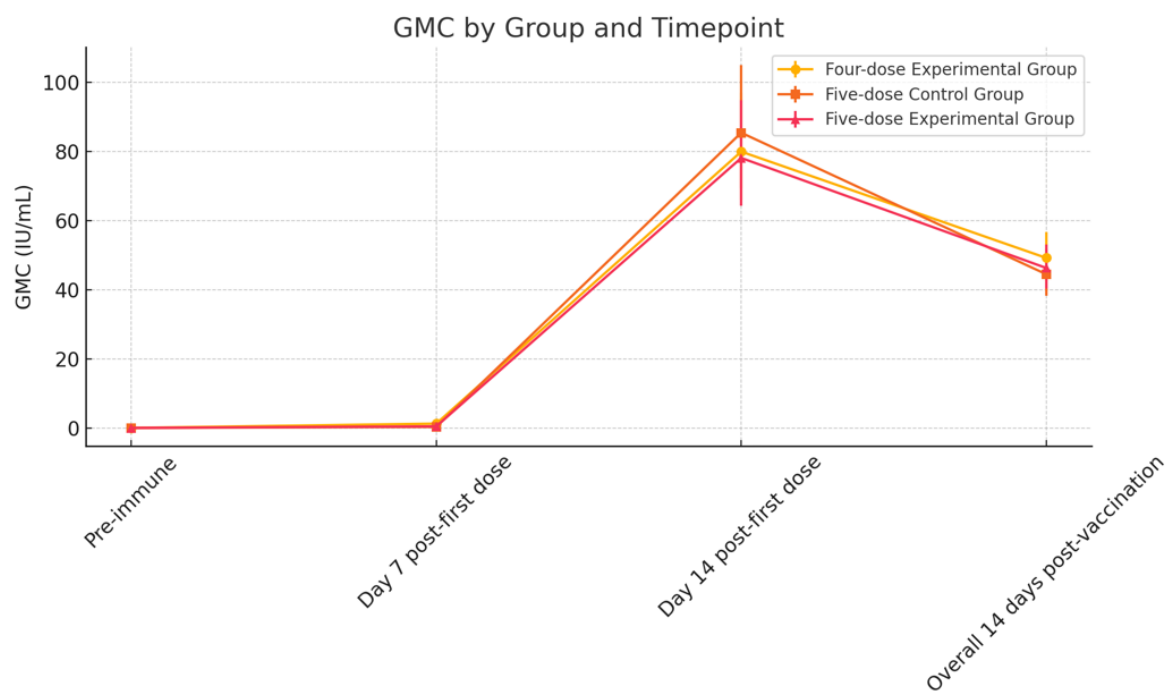

Supplementary Figure S1B

Supplement: s1 [file vaccines-3192861-supplementary.pdf › vaccines-3192861-supplementary.pdf]
